# Supplementary material for: Crayfish–Fish Aquaculture Ponds Exert Reduced Climatic Impacts and Higher Economic Benefits than Traditional Wheat–Rice Paddy Cultivation
Source: MDPI journal article supplement (doi:10.3390/agriculture12040515), 2022-04-05
Supplement: s1 [file s1]

**Table S1.** Wheat, rice and fish yield during the study period.

| Element                                   | Yield (kg ha <sup>-1</sup> ) |
|-------------------------------------------|------------------------------|
| Wheat                                     | 6000                         |
| Rice                                      | 9375                         |
| Freshwater crayfish                       | 3375                         |
| Freshwater bighead carp and mandarin fish | 4425                         |
